# Supplementary material
Source: PubMed Central journal article supplement (PMC6105816)
Supplement: zac008187326s1.pdf [file zac008187326s1.pdf]

1 **Supplemental Material**

2

3 **Antibacterial spectrum of a tetrazole-based reversible inhibitor of**  
4 **serine  $\beta$ -lactamases**

5

6 **Orville A. Pemberton,<sup>a,\*</sup> Xiujun Zhang,<sup>a,\*</sup> Derek A. Nichols,<sup>a</sup> Kyle DeFrees,<sup>b</sup>**

7 **Priyadarshini Jaishankar,<sup>b</sup> Richard Bonnet,<sup>c,d</sup> Jessie Adams,<sup>e</sup> Lindsey N. Shaw,<sup>e</sup>**

8 **Adam R. Renslo,<sup>b,#</sup> Yu Chen<sup>a,#</sup>**

9

10 Department of Molecular Medicine, University of South Florida, 12901 Bruce B. Downs  
11 Blvd., Tampa, FL 33612, USA<sup>a</sup>; Department of Pharmaceutical Chemistry and Small  
12 Molecule Discovery Center, University of California San Francisco, 1700 4th St., Byers  
13 Hall S504, San Francisco, CA 94158, USA<sup>b</sup>; Clermont Université, Université  
14 d'Auvergne, Inserm U1071, INRA USC2018, Clermont-Ferrand, France<sup>c</sup>; CHU  
15 Clermont-Ferrand, Laboratoire de Bactériologie Clinique, Clermont-Ferrand, France<sup>d</sup>;  
16 Department of Cell Biology, Microbiology & Molecular Biology, University of South  
17 Florida, 4202 E. Fowler Ave., Tampa, FL 33620, USA<sup>e</sup>

18

19 \* These authors contributed equally to this work.

20 # Address correspondence to Yu Chen, [ychen1@health.usf.edu](mailto:ychen1@health.usf.edu) and Adam R. Renslo,  
21 [adam.renslo@ucsf.edu](mailto:adam.renslo@ucsf.edu)

| <b>Table S1. X-ray Data Collection and Refinement Statistics</b> |                                       |                                 |
|------------------------------------------------------------------|---------------------------------------|---------------------------------|
|                                                                  | CTX-M-14 S237A with compound <b>1</b> | CTX-M-27 with compound <b>1</b> |
| <b>Data Collection</b>                                           |                                       |                                 |
| Space group                                                      | P2 <sub>1</sub>                       | P2 <sub>1</sub>                 |
| Cell dimensions                                                  |                                       |                                 |
| a, b, c (Å)                                                      | 45.19, 107.13, 47.85                  | 44.96, 107.24, 47.79            |
| $\alpha$ , $\beta$ , $\gamma$ (°)                                | 90, 101.52, 90                        | 90, 101.86, 90                  |
| Resolution (Å)                                                   | 34.13 – 1.05 (1.11 – 1.05)            | 35.95 – 1.15 (1.21 – 1.15)      |
| No. of unique reflections                                        | 204,404 (28,335)                      | 156,537 (22,838)                |
| R <sub>merge</sub> (%)                                           | 6.4 (24.0)                            | 10.4 (60.4)                     |
| I/ $\sigma$ (I)                                                  | 11.4 (4.1)                            | 7.5 (2.2)                       |
| Completeness (%)                                                 | 98.8 (93.9)                           | 100 (100)                       |
| Multiplicity                                                     | 3.5 (3.0)                             | 3.6 (3.5)                       |
|                                                                  |                                       |                                 |
| <b>Refinement</b>                                                |                                       |                                 |
|                                                                  |                                       |                                 |
| Resolution (Å)                                                   | 29.40 – 1.05                          | 35.95 – 1.15                    |
| R <sub>work</sub> (%)                                            | 12.61                                 | 14.09                           |
| R <sub>free</sub> (%)                                            | 14.66                                 | 16.60                           |
| No. atoms                                                        |                                       |                                 |
| Protein                                                          | 4,073                                 | 4,039                           |
| Ligand/Ion                                                       | 108                                   | 138                             |
| Water                                                            | 908                                   | 890                             |
| B-factors (Å <sup>2</sup> )                                      |                                       |                                 |
| protein                                                          | 9.46                                  | 9.37                            |
| ligand/ion                                                       | 19.11                                 | 16.12                           |
| water                                                            | 28.68                                 | 26.90                           |
| RMS deviations                                                   |                                       |                                 |
| Bond lengths (Å)                                                 | 0.008                                 | 0.009                           |
| Bond angles (°)                                                  | 1.33                                  | 1.35                            |
| Ramachandran plot                                                |                                       |                                 |
| favored (%)                                                      | 98.07                                 | 98.08                           |
| allowed (%)                                                      | 1.54                                  | 1.54                            |
| outliers (%)                                                     | 0.39                                  | 0.38                            |
| PDB code                                                         | 6BT6                                  | 6BU3                            |

22 \*Statistics for the highest-resolution shell are shown in parentheses
